# Supplementary material for: Arctic black carbon during PAMARCMiP 2018 and previous aircraft experiments in spring
Source: Copernicus journal article supplement (doi:10.5194/acp-21-15861-2021), 2021-11-04
Supplement: Supplementary file 1 [file acp-21-15861-2021-supplement.pdf]

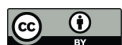

*Supplement of*

## **Arctic black carbon during PAMARCMiP 2018 and previous aircraft experiments in spring**

**Sho Ohata et al.**

*Correspondence to:* Sho Ohata ([sho.ohata@isee.nagoya-u.ac.jp](mailto:sho.ohata@isee.nagoya-u.ac.jp))

The copyright of individual parts of the supplement might differ from the article licence.

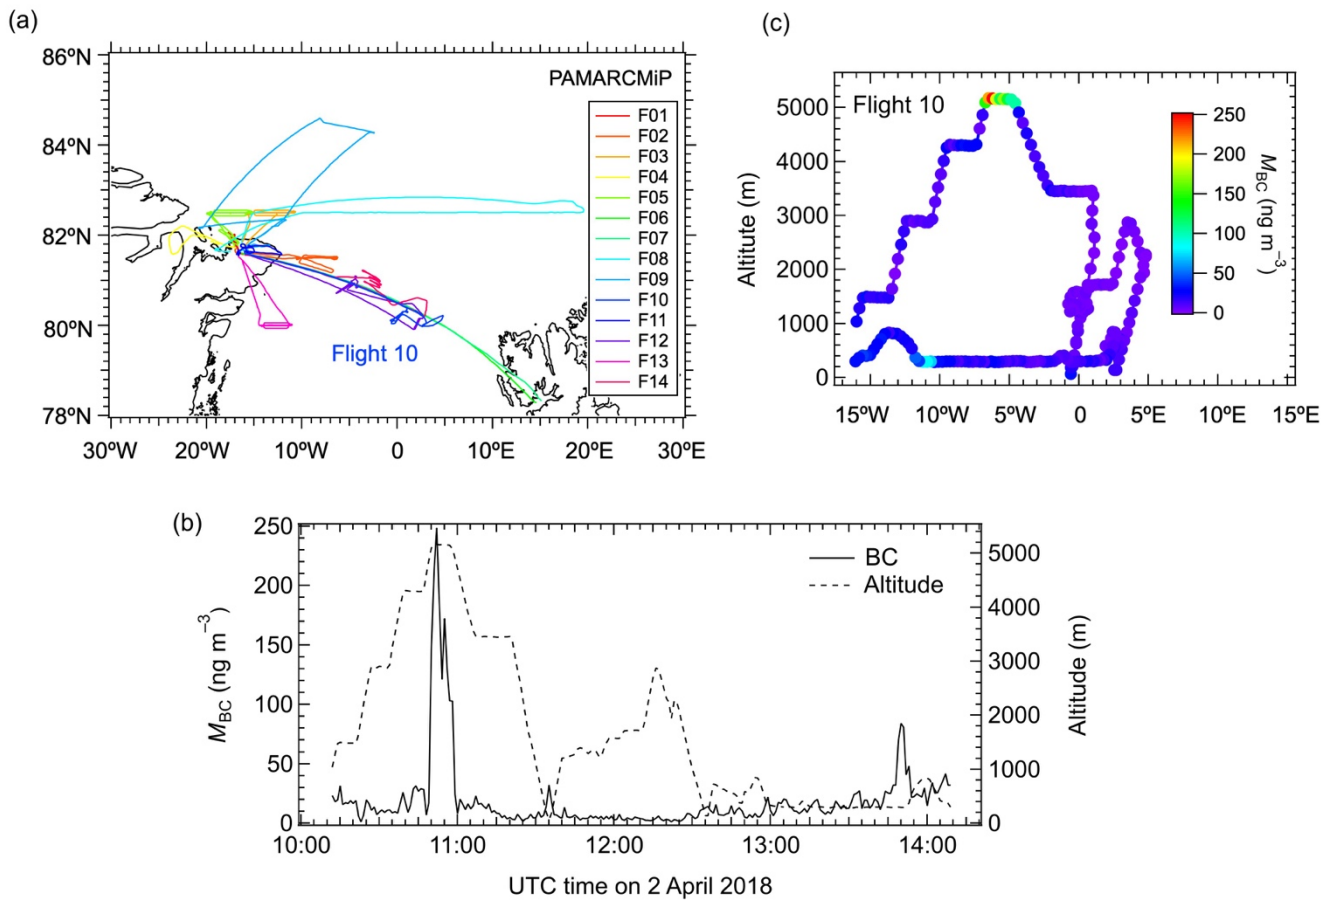

**Figure S1.** (a) Map of the flight tracks of the PAMARCMiP aircraft-based field experiment. (b) Time series of one-minute data of BC mass concentration ( $M_{BC}$ ) (solid line) and aircraft altitudes (dashed line) for Flight 10 on 2 April 2018. (c) Altitude-longitude cross section of  $M_{BC}$  for the same flight. The plumes with enhanced  $M_{BC}$  values were observed at altitudes around 5 km.
